# Supplementary material for: CVD synthesis of large-area, highly crystalline MoSe2atomic layers on diverse substrates and application to photodetectors
Source: Royal Society of Chemistry journal article supplement (doi:10.1039/c4nr02311k), 2014-06-03
Supplement: c4nr02311k1.pdf [file c4nr02311k1.pdf]

## Supporting Information

# CVD Synthesis of Large-area Highly Crystalline MoSe<sub>2</sub> Atomic Layers on Diverse Substrates and Photodetector Application

Jing Xia,<sup>a</sup> Xing Huang,<sup>ab</sup> Ling-Zhi Liu,<sup>c</sup> Meng Wang,<sup>a</sup> Lei Wang,<sup>a</sup> Ben Huang,<sup>a</sup> Dan-Dan Zhu,<sup>a</sup> Jun-Jie Li,<sup>c</sup> Chang-Zhi Gu,<sup>c</sup> and Xiang-Min Meng<sup>a\*</sup>

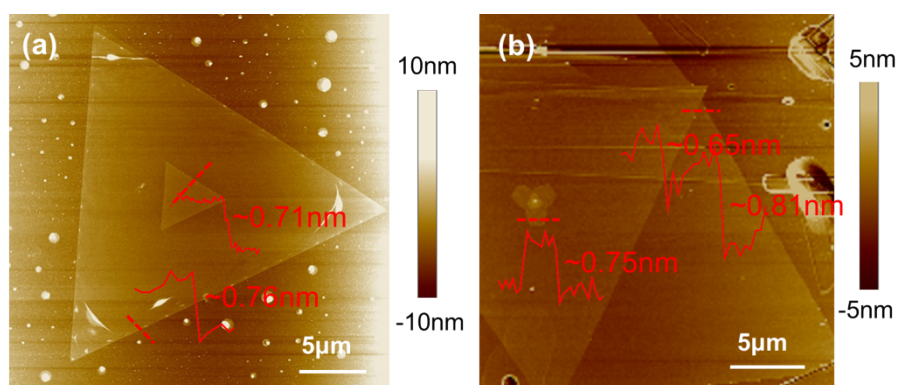

**Fig. S1** AFM images and height profile of bilayer and trilayer MoSe<sub>2</sub> flakes.

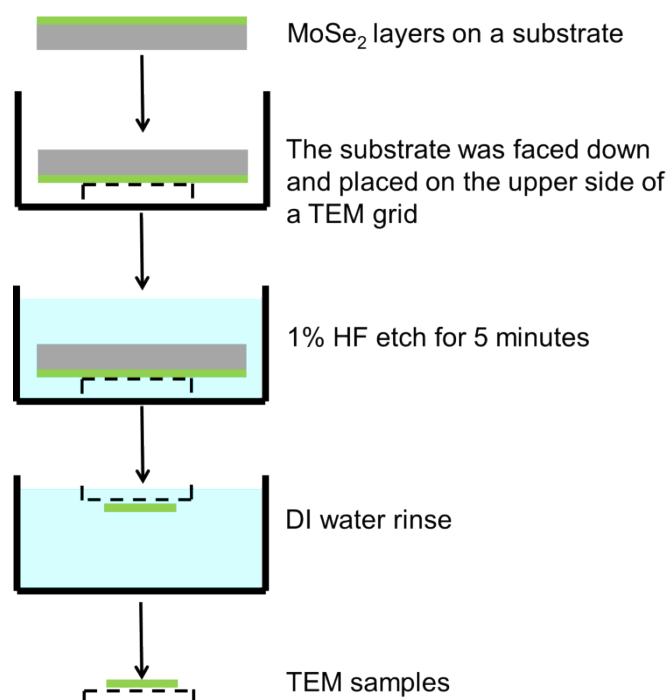

**Fig. S2** A direct transfer method used for preparation of MoSe<sub>2</sub> TEM samples.
